# Supplementary material for: Co-Delivery of a High Dose of Amphotericin B and Itraconazole by Means of a Dry Powder Inhaler Formulation for the Treatment of Severe Fungal Pulmonary Infections
Source: MDPI journal article supplement (doi:10.3390/pharmaceutics15112601), 2023-11-08
Supplement: s1 [file s1]

# **Supplementary Materials: Co-Delivery of a High Dose of Amphotericin B and Itraconazole by Means of a Dry Powder Inhaler Formulation for the Treatment of Severe Fungal Pulmonary Infections**

Salomé S. Celi, Raquel Fernández-García, Andreina I. Afonso-Urich, M. Paloma Ballesteros, Anne Marie Healy and Dolores R. Serrano

## Results section – Box Behnken model

### 1. Yield

Summary (detailed tables shown below)

| Source     | Sequential<br>p-value | Lack of Fit<br>p-value | Adjusted<br>R-Squared | Predicted<br>R-Squared |                  |
|------------|-----------------------|------------------------|-----------------------|------------------------|------------------|
| Linear     | 0,2474                | 0,0376                 | 0,0945                | -0,4147                |                  |
| <u>2FI</u> | <u>0,0546</u>         | <u>0,0761</u>          | <u>0,4321</u>         | <u>-0,3021</u>         | <u>Suggested</u> |
| Quadratic  | 0,2114                | 0,0872                 | 0,5572                | -1,4710                |                  |
| Cubic      | 0,0872                |                        | 0,8259                |                        | Aliased          |

| Source                     | Sum of<br>Squares | df | Mean<br>Square | F<br>Value | p-value<br>Prob > F |
|----------------------------|-------------------|----|----------------|------------|---------------------|
| Model                      | 895,06            | 6  | 149,18         | 3,03       | 0,0590              |
| <i>A-Antibiotics total</i> | 253,58            | 1  | 253,58         | 5,15       | 0,0466              |
| <i>B-Flow rate</i>         | 81,79             | 1  | 81,79          | 1,66       | 0,2265              |
| <i>C-Leucina</i>           | 31,28             | 1  | 31,28          | 0,64       | 0,4440              |
| <i>AB</i>                  | 175,30            | 1  | 175,30         | 3,56       | 0,0886              |
| <i>AC</i>                  | 297,91            | 1  | 297,91         | 6,05       | 0,0337              |
| <i>BC</i>                  | 55,20             | 1  | 55,20          | 1,12       | 0,3146              |
| Residual                   | 492,49            | 10 | 49,25          |            |                     |
| <i>Lack of Fit</i>         | 432,10            | 6  | 72,02          | 4,77       | 0,0761              |
| <i>Pure Error</i>          | 60,39             | 4  | 15,10          |            |                     |
| Cor Total                  | 1387,55           | 16 |                |            |                     |

## 2. Particle size

Summary (detailed tables shown below)

|               | Sequential    | Lack of Fit   | Adjusted      | Predicted     |                  |
|---------------|---------------|---------------|---------------|---------------|------------------|
| Source        | p-value       | p-value       | R-Squared     | R-Squared     |                  |
| <u>Linear</u> | <u>0,0199</u> | <u>0,6719</u> | <u>0,4083</u> | <u>0,1741</u> | <u>Suggested</u> |
| 2FI           | 0,8180        | 0,5377        | 0,2961        | -0,5098       |                  |
| Quadratic     | 0,8076        | 0,3348        | 0,1174        | -2,5899       |                  |
| Cubic         | 0,3348        |               | 0,2829        |               | Aliased          |

| Source                     | Sum of Squares | df       | Mean Square  | F Value      | p-value       |                        |
|----------------------------|----------------|----------|--------------|--------------|---------------|------------------------|
| Model                      | 3,05           | 3        | 1,02         | 4,68         | 0,0199        | significant            |
| <i>A-Antibiotics total</i> | <i>0,48</i>    | <i>1</i> | <i>0,48</i>  | <i>2,21</i>  | <i>0,1612</i> |                        |
| <i>B-Flow rate</i>         | <i>2,48</i>    | <i>1</i> | <i>2,48</i>  | <i>11,38</i> | <i>0,0050</i> |                        |
| <i>C-Leucina</i>           | <i>0,099</i>   | <i>1</i> | <i>0,099</i> | <i>0,46</i>  | <i>0,5118</i> |                        |
| Residual                   | 2,83           | 13       | 0,22         |              |               |                        |
| <i>Lack of Fit</i>         | <i>1,77</i>    | <i>9</i> | <i>0,20</i>  | <i>0,75</i>  | <i>0,6719</i> | <i>not significant</i> |
| <i>Pure Error</i>          | <i>1,05</i>    | <i>4</i> | <i>0,26</i>  |              |               |                        |
| Cor Total                  | 5,88           | 16       |              |              |               |                        |

### 3. Aggregation state

Summary (detailed tables shown below)

| Source    | Sequential Lack of Fit p-value | Adjusted R-Squared | Predicted R-Squared |                  |
|-----------|--------------------------------|--------------------|---------------------|------------------|
| Linear    | 0,0466                         | 0,2288             | 0,3192              | 0,0130 Suggested |
| 2FI       | 0,9958                         | 0,1329             | 0,1203              | -1,1143          |
| Quadratic | 0,3704                         | 0,1110             | 0,1754              | -3,4440          |
| Cubic     | 0,1110                         |                    | 0,6320              | Aliased          |

| Source              | Sum of Squares | df | Mean Square | F Value | p-value |                 |
|---------------------|----------------|----|-------------|---------|---------|-----------------|
| Model               | 0,093          | 3  | 0,031       | 3,50    | 0,0466  | significant     |
| A-Antibiotics total | 0,092          | 1  | 0,092       | 10,45   | 0,0066  |                 |
| B-Flow rate         | 2,645E-004     | 1  | 2,645E-004  | 0,030   | 0,8653  |                 |
| C-Leucina           | 2,311E-004     | 1  | 2,311E-004  | 0,026   | 0,8740  |                 |
| Residual            | 0,11           | 13 | 8,830E-003  |         |         |                 |
| Lack of Fit         | 0,096          | 9  | 0,011       | 2,23    | 0,2288  | not significant |
| Pure Error          | 0,019          | 4  | 4,773E-003  |         |         |                 |
| Cor Total           | 0,21           | 16 |             |         |         |                 |

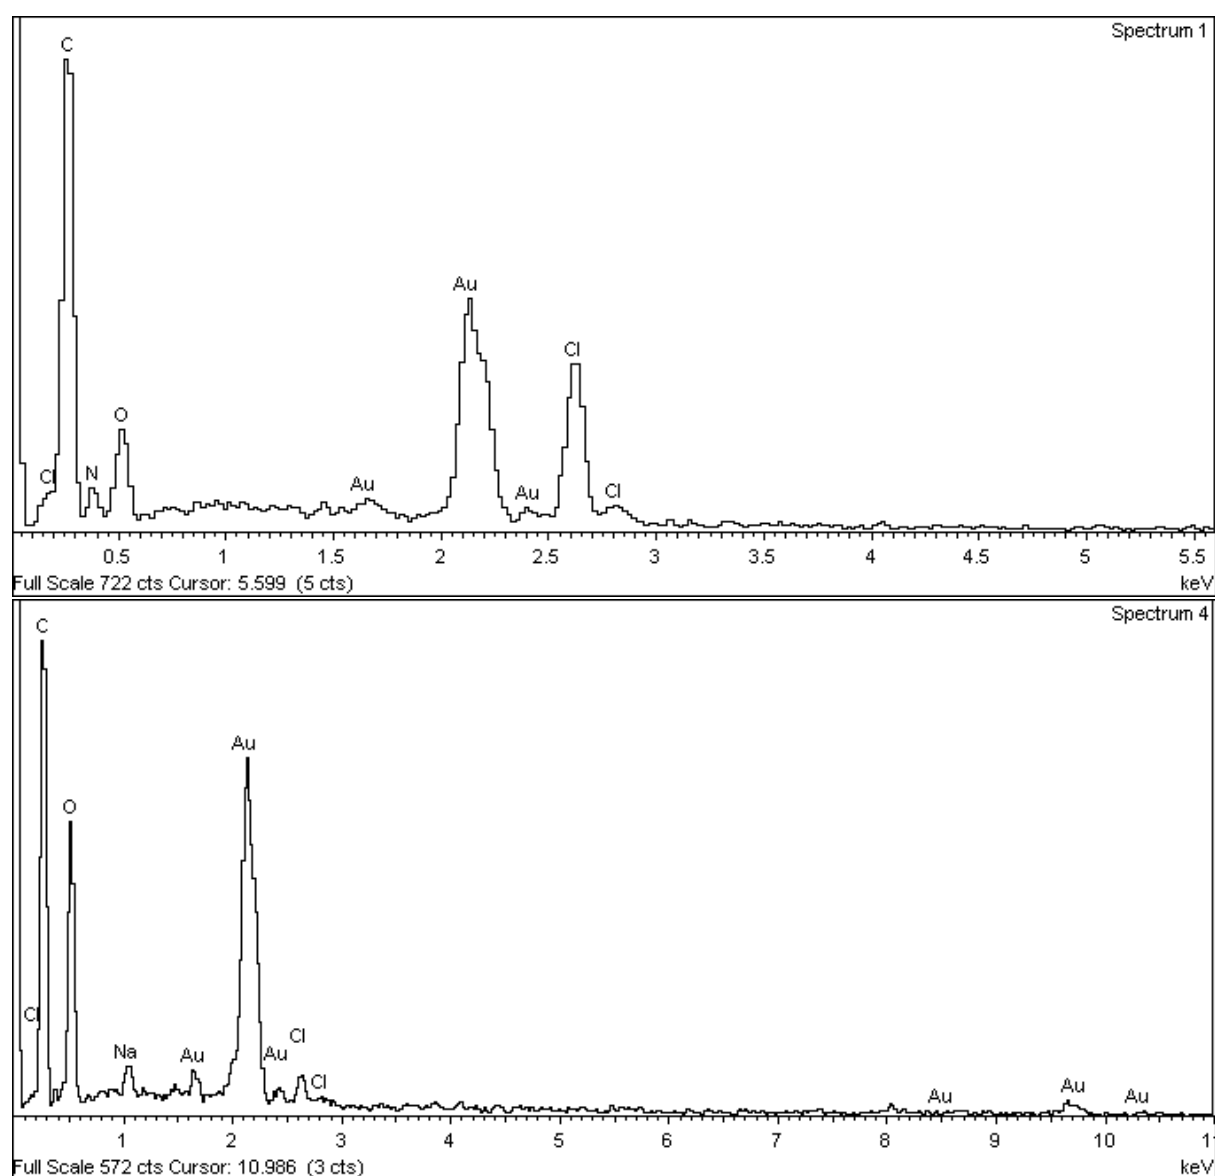

**Figure S1. EDX spectra for F1.**

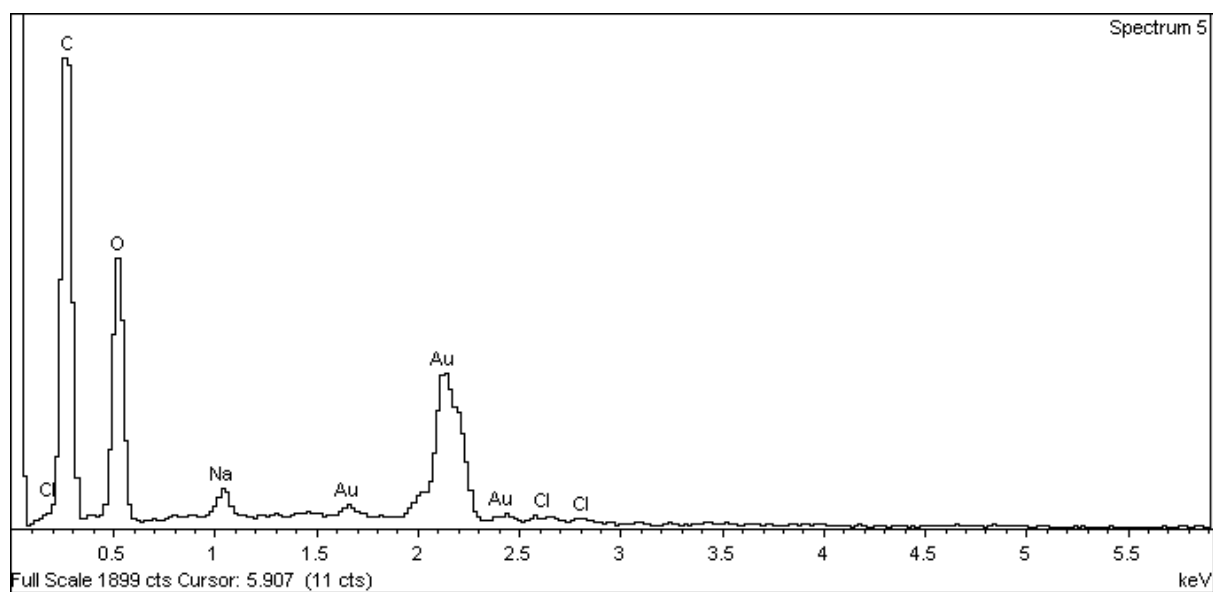

Figure S2. EDX spectra for F2.

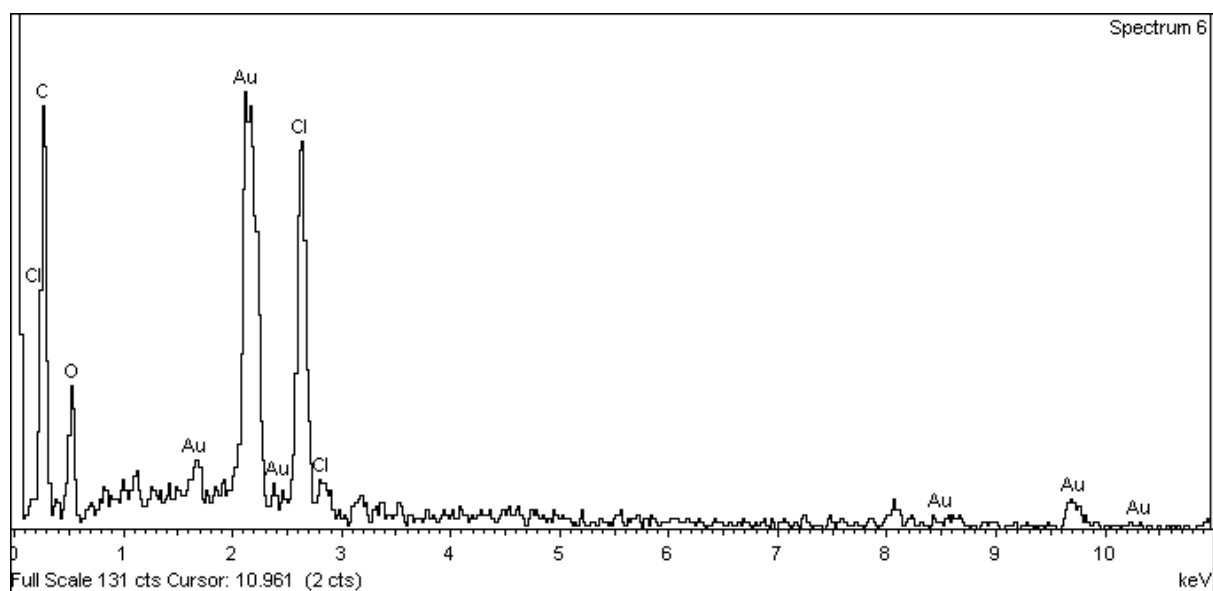

Figure S3. EDX spectra for F3
